# Supplementary material for: Native llama Nanobody Library Panning Performed by Phage and Yeast Display Provides Binders Suitable for C-Reactive Protein Detection
Source: MDPI journal article supplement (doi:10.3390/bios11120496), 2021-12-03
Supplement: s1 [file s1]

Supplementary Material

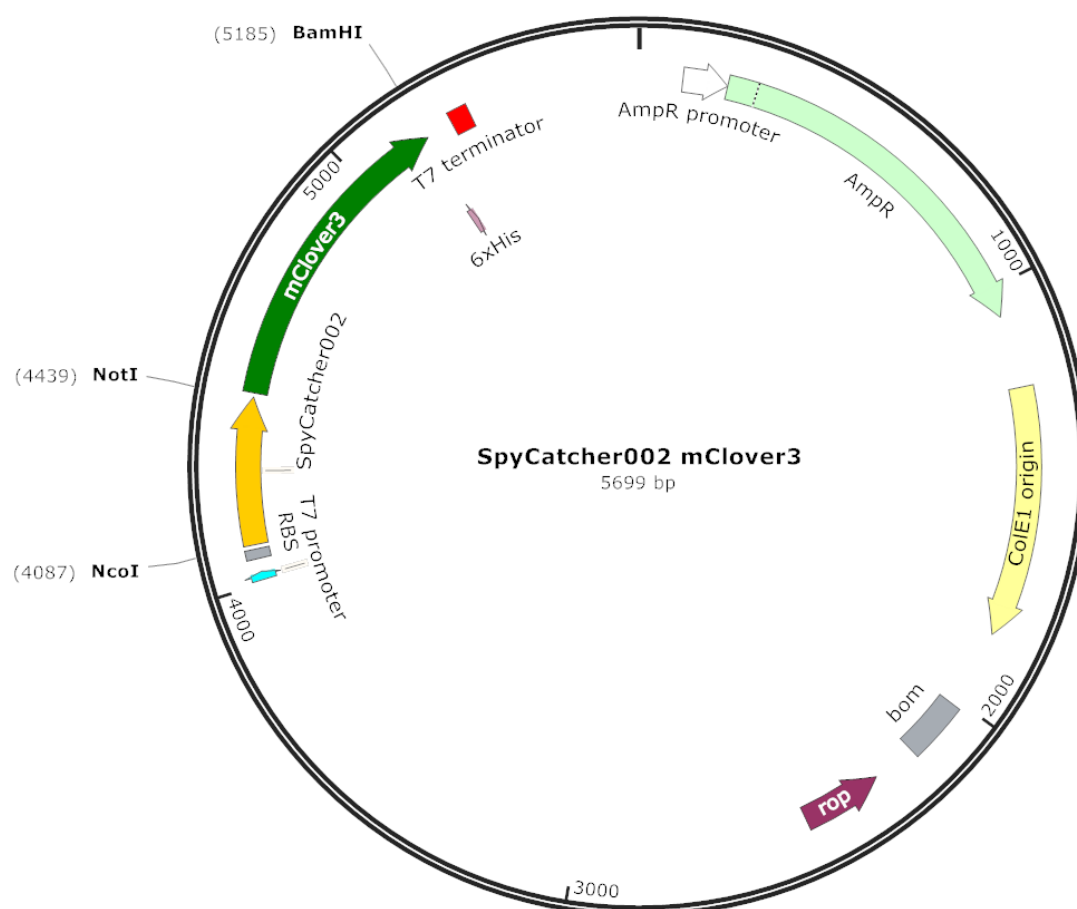

**Figure S1.** Characteristics of the vector used for the production of the SpyCatcher002-mClover3-HisTag fusion protein.

>A6\_CRP

MAEVQLQASGGGLVRPGGSLRLSCAVSGGTLSNYAVGWFRRAPGNQREL VATFTSGGTTLYADSVKGRFTISRDNLKNTV  
YLQMNSLKPEDTAVYYCAAKPGRASSQATDYDAWGQGTQVTVSS

ABR1: GTLSNYAVG (29-37) ABR2: LVATFTSGGTTLYA (49-62) ABR3: AAKPGRASSQATDYDA (98-113)

>B9\_CRP

MAEVQLQASGGGSVQAGGSLRLSCATSGIIFRNNIMTWYRQAPGKNREL VATITTTGGSTNYSDSVKGRFTISRDNKNTV  
YLQMSNLKPDDTGYYCNARRNRFLTGSYGQGTQVTVSS

ABR1: IIFRNNIMT (29-37) ABR2: LVATITTTGGSTNY (49-61) ABR3: ARNRFLTGS (99-108)

>E12\_CRP

MAEVQLQASGGGLVQAGGSLRLSCAASRRPSSFVKMGWYRQAPGKQREL VARITSGGSTDYADSVKGRFTISRDNKNTV  
YLQMNSLEPEDTAVYYCNAYRWGRDNWGQGTQVTVSS

ABR1: RRPSSFVKMG (28-37) ABR2: LVARITSGGSTDY (49-61) ABR3: AYRWGRDN (99-106)

>C10\_CRP

MAEVQLQASGGGLVQAGGSLRLSCAASGRFTSNYGMGWFRQAPGKEREFVAAITSGGSTYYRDSVKGRFTISRDNKNTV

YLQMNSLKPDDTAVYYCAASRGVTAIWGSSYDWGQRTLTVSS

ABR1: RTFSNYGMG (29-37) ABR2: FVAAITSGGSTYYR (49-62) ABR3: AASRGVTAIWGSSYDY (98-113)

>A12\_CRP

MAEVQLQASGGGLVQAGGSLGLSCAASTRAFSTYAMGWFRQVPGKEREFVAAISSGGSTVYADSVKGRFTISRDNKNTV  
YLQMNNLRPEDTAVYYCAARQGIVVRSPTRMDYWGQGTQVTSS

ABR1: TRAFSTYAMG (28-37) ABR2: FVAAISSGGSTVY (49-61) ABR3: ARQGIVVRSPTRMDY (99-113)

>H7\_CRP

MAEVQLQASGGGLVQAGGSLRLSCAASGRFTSSYATGWYRQAPGKERELVAAISSGGSTYYADSVKGRFTISRDNKNTV  
YLQMNSLKAEDTAVYYCAGRRVGVLIGNEYDYWGQGTQVTSS

ABR1: RTFSSYATG (29-37) ABR2: LVAAISSGGSTYYA (49-62) ABR3: AGRRVGVLIGNEYDY (98-113)

>A10\_CRP

MAEVQLQASGGGLVQAGGSLRLSCVASRSILSLAVMGWYRQAPGKERELVASITSGGNTNYADVVKGRFIISRDNKNTV  
NLQMNTLRPEDTAVYYCSAKSILTGNHWRQETQVTSS

ABR1: RSILSLAVMG (28-37) ABR2: LVASITSGGNTNYA (49-62) ABR3: AKSILTGNH (99-108)

>C1\_CRP

MADVQLQASGGGLVQPGGSLRLSCRAPRMVFRNRVMGWFRQAPGKQRELVAITNDGVTKYTDVKGRFTISRDNKNTM  
YLQMNNLKTEDTAVYYCNVRRVLGIAGYWGQGTQVTSS

ABR1: PRMVFRNRVMG (27-37) ABR2: LVAYITNDGVTKYT (49-62) ABR3: NVRRVLGIAGY (98-108)

**Figure S2.** Results of Paratome predictions, the software predicts the Antigen Binding Regions (ABRs, reported in color) that should correspond to nanobody residues potentially involved in the paratope.

Yeast cells were labeled with CRP-ATTO647N conjugate (target binding) and biotinylated anti-c-myc antibody in combination with R-phycoerythrin conjugated streptavidin (surface presentation). Double labeled cells (the upper right population) were sorted out (round 1) and immediately resorted (round 1 resort). The twice sorted yeasts were plated for single clone analysis.

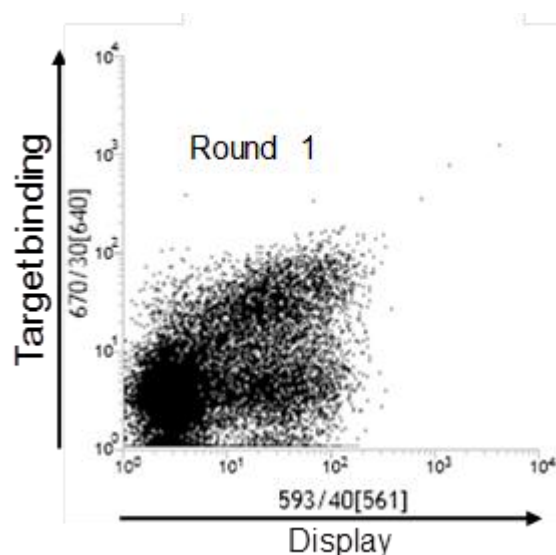

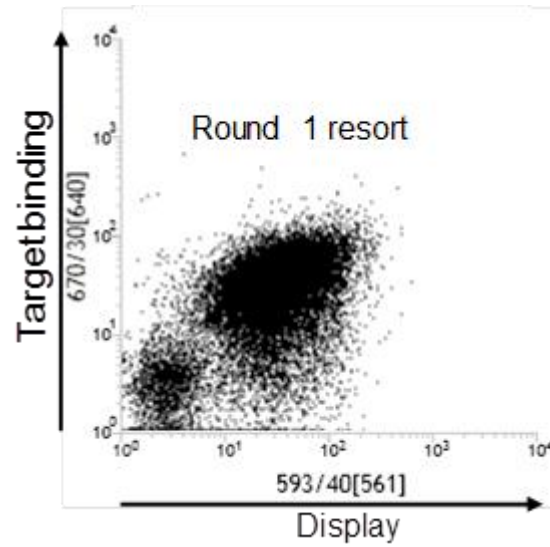

**Figure S3.** Specific enrichment of yeast clones displaying anti-CRP nanobodies by flow-cytometry. The whole population of yeast displayed nanobodies was analyzed and sorted by flow-cytometer.

Nanobody constructs were first purified in small-scale to verify their soluble expression and then in preparative large-scale. Only fractions showing no apparent contaminants were pooled and desalted. M: molecular weight marker; Sn: supernatant, P: pellet; Ft: flow-through; E: elution fractions; D: desalting fractions

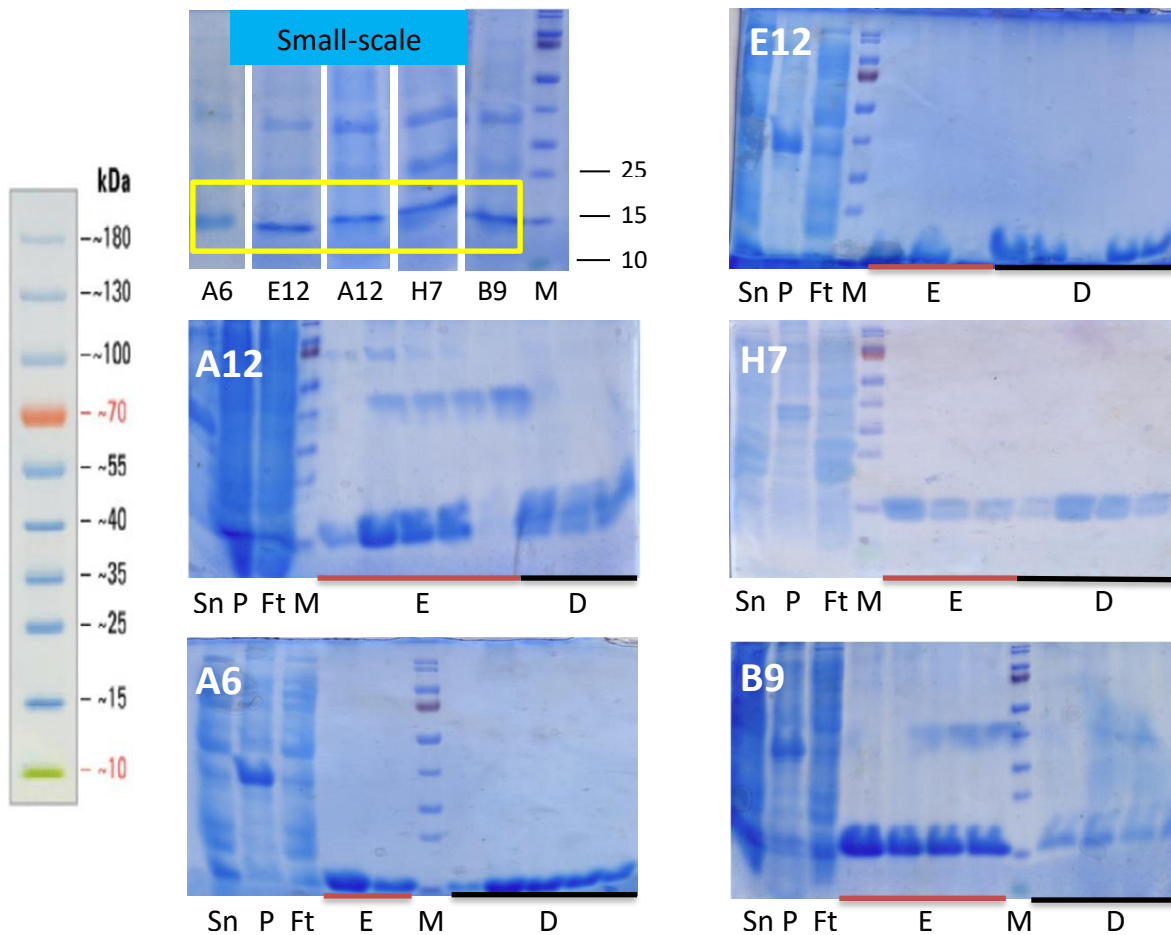

**Figure S4.** SDS-PAGE corresponding to nanobody purifications.

The obtained data were analyzed using the Octet Data Analysis HT Software (Version 11, ForteBio) after reference subtraction. The reference was the value obtained using the same APS sensor activated with the ligand (CRP, 25 nM) in the absence of analyte and was subtracted according to the manufacturer's recommendations. Curves were aligned on the Y-axis and to the beginning of the dissociation step, the Savitzky-Golay filtering was used to remove high-frequency noises from the data applying the Pall ForteBio LLC, Octet Data Analysis High Throughput system. The kinetic analysis was performed using a 1:1 binding model and global fitting.

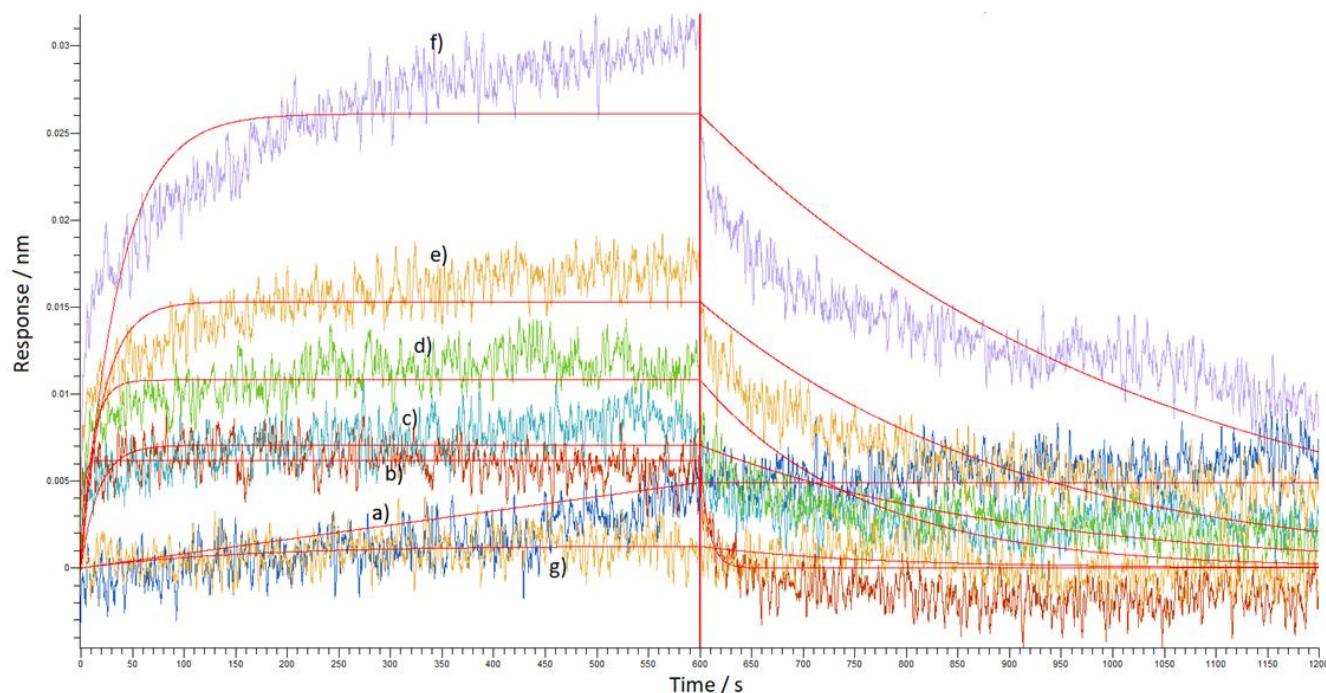

**Figure S5.** E12 affinity calculation.

**Table S1.** APS sensor with immobilised CRP (25nM) responses, obtained for E12 nanobodies at concentrations of a) 10; b) 50; c) 100; d) 300; e) 600; f) 1200 nM; g) non-specific binding 1200nM E12 nanobodies to the APS sensor surface. Red lines mean theoretical response after using 1:1 fitting model.

| Receptors  | $K_D$ (M) | $K_D$ Error | $k_a$ (1/Ms) | $k_a$ Error | $k_{dis}$ (1/s) | $k_{dis}$ Error | $X^2$  | $R^2$  |
|------------|-----------|-------------|--------------|-------------|-----------------|-----------------|--------|--------|
| Nanobodies | 1,31E-08  | 3,22E-10    | 1,96E+05     | 4,72E+03    | 2,57E-03        | 1,19E-05        | 0,2941 | 0,8662 |

$K_D$  – Affinity constant

$k_a$  – Rate of association

$k_{dis}$  – Rate of dissociation

$X^2$  is the sum of the squared deviations, which generally should be below 3.  $X^2$  is a measure of error between the experimental data and the fitted line. A smaller  $X^2$  indicates a better fit.

The  $R^2$  value indicates how well the fit and the experimental data correlate.

The theoretical plots are the red lines on pictures (Fig. 1); kinetic parameters are acceptable according to the manufacturer's indications, namely the coefficient correlation  $r$  is  $>80\%$  and the chi-squared  $r < 3.0$ .

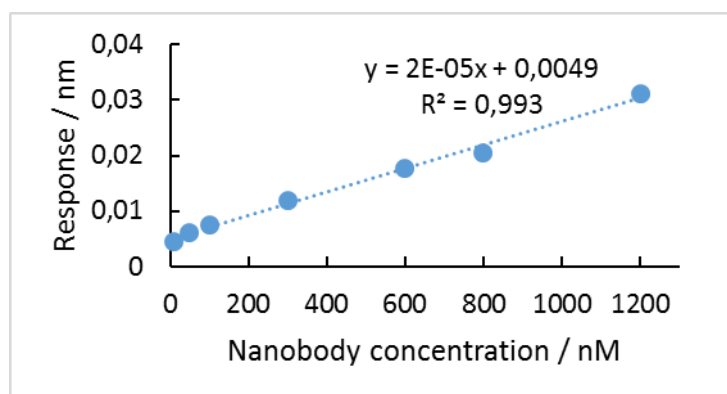

**Figure S6.** Reconstitution of the nanobody-SpyTag:SpyCatcher-mClover3 complex.

Purified SpyTagged nanobodies were incubated with SpyCatcher-mClover3 to promote the formation of the covalent binding between the two tag moieties. The reaction products were separated by SDS-PAGE and the arrows indicate the protein bands corresponding to: i) the reconstituted SpyTag-SpyCatcher complex (red); the SpyCatcher-mClover3 fusion protein (green); the nanobodies (black). The fluorescent fusion protein appears as a duet.

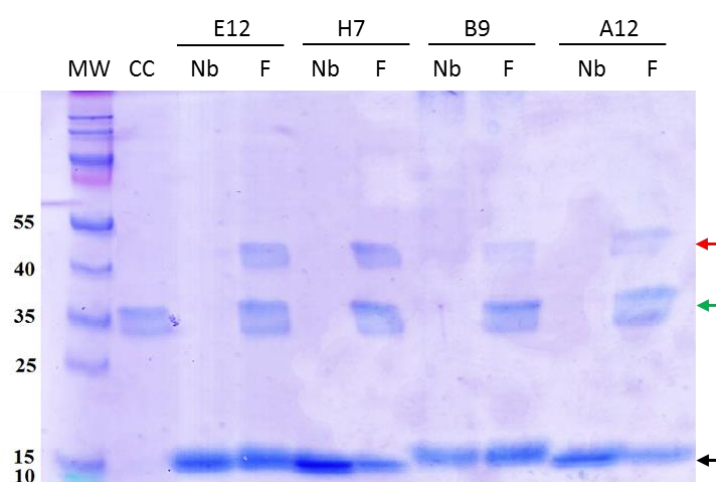

**Figure S7.** Biosensor electrochemical kinetic analysis.

The biosensor was analyzed for values ranging from 20 to 200 mV/s and the results demonstrated that the reaction at the electrode surface was a diffusion-controlled one

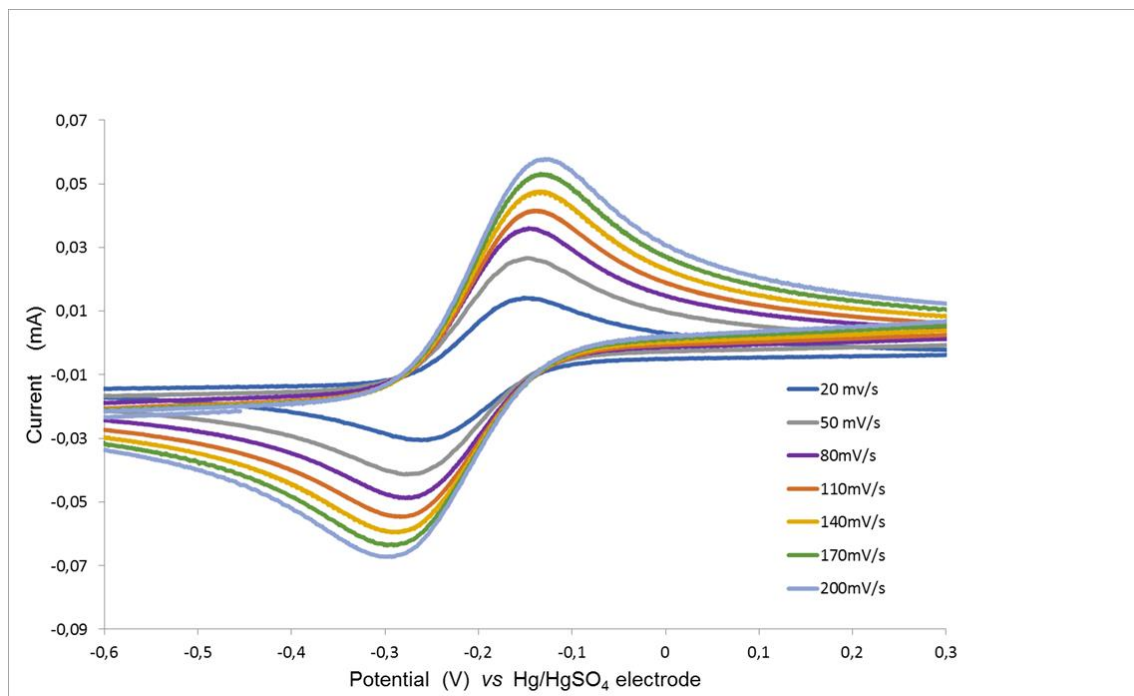

**Figure S8.** Characterization of the impedance-based biosensor sensitivity.

Experimental evaluation of CRP concentrations between 0.25 and 1  $\mu\text{g}/\text{mL}$ . Calculation of the limit of detection (LOD) was performed considering the experimental data:

| CRP conc ( $\mu\text{g}$ ) | Rct (ohms) |
|----------------------------|------------|
| 0,25                       | 1456       |
| 0,35                       | 2020       |
| 0,5                        | 3023       |
| 1                          | 10087      |

These were computed to obtain the values of slope and intercept standard deviation:

| ANOVA            |              |                |                                |          |                     |             |              |             |
|------------------|--------------|----------------|--------------------------------|----------|---------------------|-------------|--------------|-------------|
|                  | df           | SS             | MS                             | F        | Signifi-<br>cance F |             |              |             |
| Regression       | 1            | 47206783,23    | 47206783,23                    | 85,38019 | 0,01151             |             |              |             |
| Residual         | 2            | 1105801,774    | 552900,8872                    |          |                     |             |              |             |
| Total            | 3            | 48312585       |                                |          |                     |             |              |             |
|                  | Coefficients | Standard Error | t Stat                         | P-value  | Lower 95%           | Upper 95%   | Lower 95.0%  | Upper 95.0% |
| Intercept        | -2109,052632 | 772,367113     | -2,730634948                   | 0,112023 | -5432,28            | 1214,174835 | -5432,280099 | 1214,174835 |
| X Variable 1     | 11915,33835  | 1289,519217    | 9,240140192                    | 0,01151  | 6366,985            | 17463,69172 | 6366,984967  | 17463,69172 |
| S.D of Intercept |              |                | 772,367113                     |          |                     |             |              |             |
| Slope            |              |                | 11915,33835                    |          |                     |             |              |             |
|                  |              |                | µg/mL                          |          |                     |             |              |             |
| LOD              |              |                | {3.3*(S.D of Intercept/Slope)} |          |                     |             |              |             |
|                  |              |                | 0,21391                        |          |                     |             |              |             |

The biosensor activated with anti-CRP nanobodies was used at the standard conditions but BSA (1  $\mu\text{g}/\text{mL}$ ) was used instead of CRP.

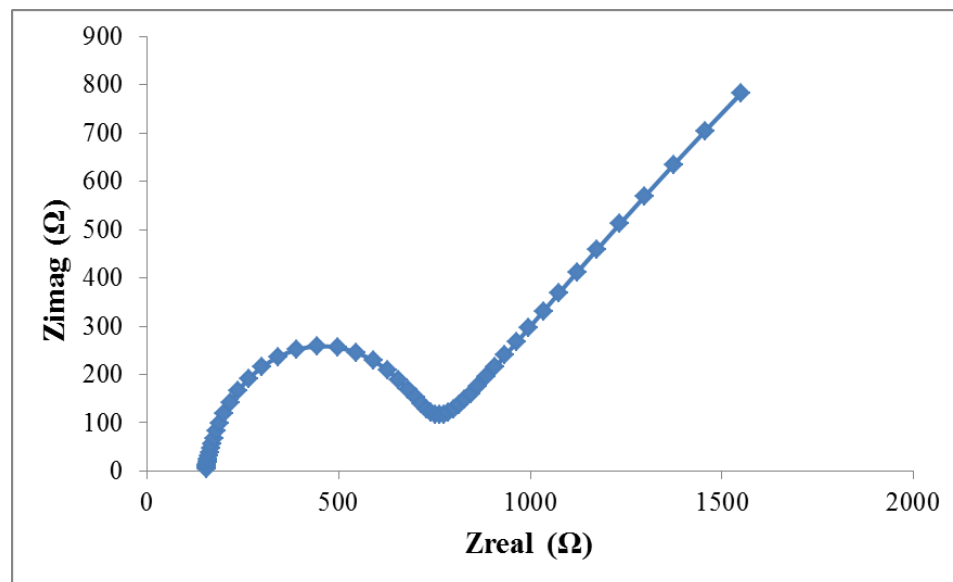

**Figure S9.** Negative control for the electrochemical impedance biosensor.
